# Supplementary material
Source: HighWire-hosted journal article supplement (https://www.cmajopen.ca/highwire/filestream/87915/field_highwire_adjunct_files/0/2021-0095-1-at.pdf)
Supplement: 2021-0095-1-at.pdf [file 2021-0095-1-at.pdf]

## Appendix 1. Oral outpatient antibiotic drugs and classes included in the study

| <b>Class</b>                                 | <b>Drug</b>                                                                                                                |
|----------------------------------------------|----------------------------------------------------------------------------------------------------------------------------|
| Cephalosporins (first generation)            | Cefadroxil<br>Cephalexin                                                                                                   |
| Cephalosporins (second and third generation) | Cefaclor<br>cefixime<br>Cefuroxime<br>Cefprozil                                                                            |
| Fluoroquinolones (second generation)         | Ciprofloxacin<br>Norfloxacin<br>Ofloxacin                                                                                  |
| Fluoroquinolones (third generation)          | Gatifloxacin<br>Levofloxacin<br>Moxifloxacin                                                                               |
| Lincosamides                                 | Clindamycin                                                                                                                |
| Macrolides                                   | Azithromycin<br>Clarithromycin<br>Erythromycin<br>Spiramycin                                                               |
| Metronidazole                                | Metronidazole                                                                                                              |
| Nitrofurantion                               | Nitrofurantoin                                                                                                             |
| Penicillins                                  | Amoxicillin<br>Ampicillin<br>Cloxacillin<br>Dicloxacillin<br>Oxacillin<br>Penicillin G potassium<br>Penicillin V potassium |
| Penicillins with beta-lactamase inhibitors   | Amoxicillin-clavulanate                                                                                                    |
| Tetracyclines                                | Doxycycline<br>Minocycline<br>Tetracycline                                                                                 |
| Trimethoprim and/or sulfonamides             | Sulfadiazine<br>Sulfamethoxazole<br>Sulfamethoxazole-trimethoprim<br>Trimethoprim                                          |
| Vancomycin                                   | Vancomycin                                                                                                                 |
| Other antibiotics                            | Dapsone<br>Fidaxomicin<br>Fosfomicin<br>Fusidic acid<br>Linezolid<br>Methenamine                                           |
